# Supplementary material for: The effect of big data technologies usage on social competence
Source: PeerJ Comput Sci. 2023 Nov 17;9:e1691. doi: 10.7717/peerj-cs.1691 (PMC10703065; doi:10.7717/peerj-cs.1691)
Supplement: Data S1 [file peerj-cs-09-1691-s001.xlsx]

## Sheet: Sheet3
Self-management Skills_1	Personal Skills_1	Academic Skills_1		Self-management Skills_2	Personal Skills_2	Academic Skills_2
18	17	15		20	23	22
19	24	21		18	24	24
17	22	16		20	25	21
17	19	21		19	22	24
19	22	18		20	23	23
18	23	23		19	24	24
17	14	19		18	22	25
20	25	24		16	25	24
17	19	20		20	21	25
17	22	19		19	23	25
20	21	17		20	24	21
17	22	16		20	25	23
19	22	16		18	23	25
18	19	19		19	24	24
16	20	22		18	23	24
17	20	22		20	23	22
20	19	18		20	25	21
17	16	18		19	25	25
18	25	23		18	25	23
15	22	21		20	21	25
19	23	17		18	24	23
17	20	19		19	23	24
15	21	21		18	24	24
16	20	20		20	24	23
20	19	19		20	22	23
18	18	23		19	22	25
20	22	15		20	25	23
17	21	20		18	24	23
20	24	14		20	24	21
18	23	15		19	25	21
17	19	21		18	24	25
16	21	20		20	23	23
18	21	16		19	25	25
16	19	24		15	25	25
17	23	19		20	24	22
14	22	22		17	24	25
18	19	17		20	22	24
15	25	25		18	25	25
17	22	16		19	23	23
15	24	18		17	25	23
17	21	21		18	24	25
15	19	22		18	23	25
14	21	24		20	21	24
20	19	19		18	23	24
16	19	21		19	23	24
17	24	18		17	25	23
14	22	21		17	24	25
18	20	18		20	23	23
17	19	19		19	23	23
19	20	19		20	24	23
16	22	18		18	25	23
20	21	22		20	25	22
17	17	23		20	20	25
20	21	15		20	25	22
16	20	23		19	25	25
20	18	19		20	20	25
15	22	20		18	25	23
19	20	17		20	25	23
17	19	22		19	25	24
20	19	20		20	21	25
17	18	20		20	25	22
15	20	24		19	25	25
16	20	20		20	25	24
14	21	23		20	25	20
15	24	18		18	25	25
17	18	21		20	21	25
16	20	23		19	25	23
20	18	17		20	25	24
15	22	21		15	25	25
17	23	16		20	25	22
16	21	22		20	21	25
15	19	23		18	25	25
14	22	20		20	25	20
15	21	22		20	22	25
20	19	17		20	25	24
16	20	20		16	25	25
17	18	22		20	25	20
15	21	23		20	23	25
18	19	18		19	25	25
15	20	23		20	21	25
14	21	21		16	25	25
17	22	19		19	25	24
20	20	19		20	24	24
16	19	22		20	25	22
20	20	18		20	20	25
15	18	25		19	25	25
20	19	19		20	24	25
14	21	21		19	25	25
18	19	20		18	25	22
17	21	21		20	23	23
18	17	15		20	23	22
19	24	21		18	24	24
17	22	16		20	25	21
17	19	21		19	22	24
19	22	18		20	23	23
18	23	23		19	24	24
17	14	19		18	22	25
20	25	24		16	25	24
17	19	20		20	21	25
17	22	19		19	23	25
20	21	17		20	24	21
17	22	16		20	25	23
19	22	16		18	23	25
18	19	19		19	24	24
16	20	22		18	23	24
17	20	22		20	23	22
20	19	18		20	25	21
17	16	18		19	25	25
18	25	23		18	25	23
15	22	21		20	21	25
19	23	17		18	24	23
17	20	19		19	23	24
15	21	21		18	24	24
16	20	20		20	24	23
20	19	19		20	22	23
18	18	23		19	22	25
20	22	15		20	25	23
17	21	20		18	24	23
20	24	14		20	24	21
18	23	15		19	25	21
